# Supplementary material
Source: PubMed Central journal article supplement (PMC4180528)
Supplement: Supp_Table1.pdf [file Supp_Table1.pdf]

## Supplementary Data

TABLE S1. QUESTIONNAIRES

| <i>Questions</i>                                                                        | <i>Answers</i>             | <i>N (%) or median (IQR)</i> |
|-----------------------------------------------------------------------------------------|----------------------------|------------------------------|
| 1. The total number of pills<br>I am supposed to take is too much.                      | Agree                      | 21 (14%)                     |
|                                                                                         | Disagree                   | 93 (62%)                     |
|                                                                                         | Neither agree nor disagree | 37 (24%)                     |
| 2. The number of times each day<br>I am supposed to take my pills is too often.         | Agree                      | 15 (10%)                     |
|                                                                                         | Disagree                   | 111 (74%)                    |
|                                                                                         | Neither agree nor disagree | 25 (17%)                     |
| 3. The total number of HIV pills<br>I am supposed to take is too much.                  | Agree                      | 15 (10%)                     |
|                                                                                         | Disagree                   | 114 (77%)                    |
|                                                                                         | Neither agree nor disagree | 19 (13%)                     |
| 4. The number of times each day I am supposed<br>to take my HIV medicines is too often. | Agree                      | 11 (7%)                      |
|                                                                                         | Disagree                   | 122 (82%)                    |
|                                                                                         | Neither agree nor disagree | 15 (10%)                     |
| 5. How many pills do you feel<br>is too many to take on a daily basis?                  |                            | 10 (5–20)                    |
